# Supplementary material for: Highly sensitive and selective detection of Pb2+ions using a novel and simple DNAzyme-based quartz crystal microbalance with dissipation biosensor
Source: Royal Society of Chemistry journal article supplement (doi:10.1039/c4an00922c), 2014-07-18
Supplement: c4an00922c1.pdf [file c4an00922c1.pdf]

## Electronic Supplementary Information

# Highly sensitive and selective detection of $\text{Pb}^{2+}$ ions using a novel and simple DNAzyme-based quartz crystal microbalance with dissipation biosensor

Hui Boon Teh,<sup>a</sup> Haiyan Li,<sup>a</sup> Sam Fong Yau Li<sup>a,b,c\*</sup>

<sup>a</sup>Department of Chemistry, National University of Singapore, 3 Science Drive 3, Singapore 117543, Singapore.

<sup>b</sup>NUS Environmental Research Institute, 5A Engineering Drive 1, T-Lab Building, Singapore 117411, Singapore.

<sup>c</sup>School of Environment and Energy, Peking University Shenzhen Graduate School, University Town, Xili, Nanshan District, Shenzhen P.R.C. 518055

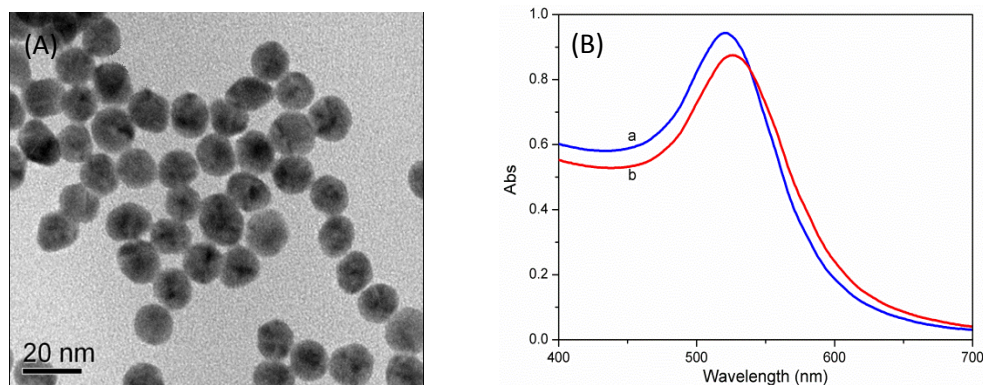

Fig. S1 (A) TEM image of AuNPs and (B) UV-Vis absorption spectra of AuNPs before (a) and after (b) immobilization with thiol-substrate.

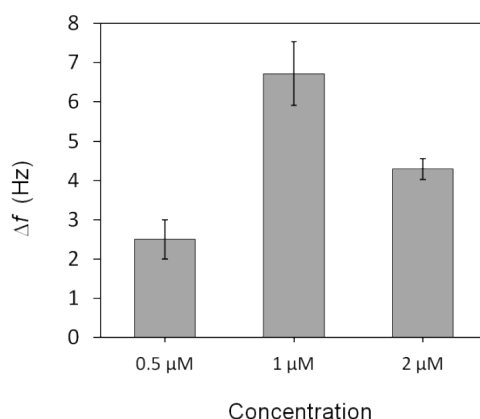

Fig. S2 The frequency response of 500 nM of  $\text{Pb}^{2+}$  ions with different concentration of DNAzyme probe on the sensor surface. The surface density of the sensor was controlled by changing the concentration of DNAzyme from 0.5 to 2  $\mu\text{M}$ . With increasing amount of DNAzymes bound to the sensor surface, the frequency change increased as more substrate strands were hybridized with DNAzymes to form the  $\text{Pb}^{2+}$ -active structure. The frequency change decreased after the concentration of DNAzyme increase to 2  $\mu\text{M}$  due to steric hindrance effect. Therefore, 1  $\mu\text{M}$  DNAzyme was chosen as the optimum condition for sensor fabrication according to the result.

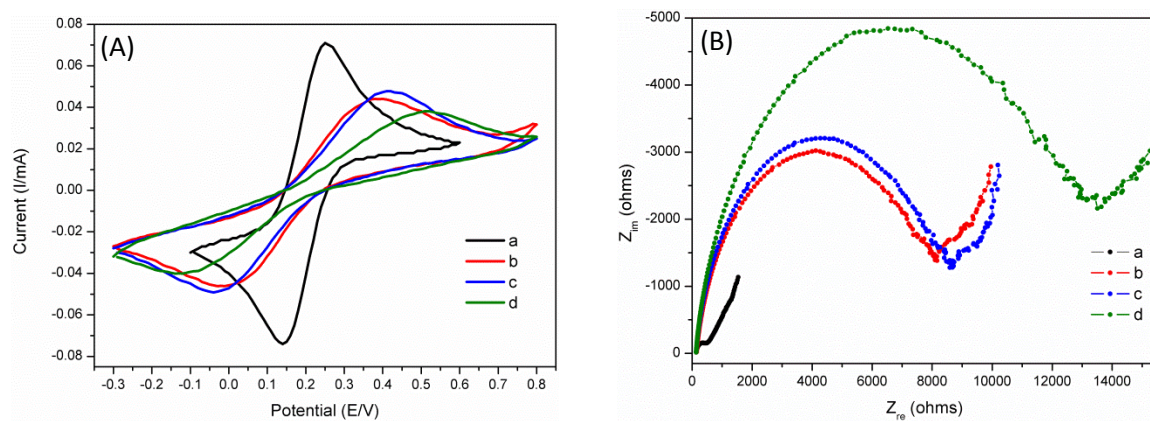

Fig. S3 Characterization of the QCM-D surface during sensor fabrication by (A) cyclic voltammetry (CV) and (B) electrochemical impedance spectroscopy (EIS). Conditions: working buffer 25 mM HEPES including 100 mM NaCl in the presence of 10 mM  $K_3Fe(CN)_6$  and 10 mM  $K_4Fe(CN)_6$ , CV: scan rate 50 mV/s, EIS: applying 5 mV alternative voltage in the frequency range of 100 mHz to 100 kHz. (a) bare gold; (b) after immobilization of GR5-E; (c) after backfilled with MCH; (d) after hybridization with substrate-functionalized AuNPs.
